# Supplementary material for: Prospective Study of Modifiable Risk Factors of Arterial Hypertension and Left Ventricular Hypertrophy in Pediatric Patients on Hemodialysis
Source: PubMed Central journal article supplement (PMC11184401; doi:10.1016/j.ekir.2024.03.016), 2024-03-18
Supplement: mmc1.pdf [file mmc1.pdf]

## Supplemental methods:

6 monthly follow-up data comprise dialysis modality characteristics, pre-dialysis mid-week blood pressure (mean of three measurements), euvolemic weight, hematology and serum biochemistry results (hemoglobin, ferritin, transferrin saturation, HCO<sub>3</sub>, serum calcium, phosphate, parathormone, albumin and CRP), residual diuresis, renal and dialytic small-molecule clearances (Kt/Vurea). Dialysis related parameters include dialysis modality, dialysis duration and frequency, blood and dialysate flow, achieved ultrafiltration, dialysate sodium, calcium and buffer, as well as information on blood volume monitoring, ultrafiltration and sodium profiling use. Medication section includes information on number and class of antihypertensives, bicarbonate supplementation, type of phosphate binder, active vit D3 sterol, lipid lowering agent, erythropoietin and growth hormone use. In addition, the results of optional echocardiographic investigations and 24-hour ambulatory BP monitoring (ABPM) are recorded, provided these were performed close to clinic visits (mean time lag  $-4 \pm 8$  weeks, not significantly different from 0). In the echocardiogram input section of the registry, left ventricular end-diastolic diameter (LVEDD), posterior wall thickness (PWT), and diastolic interventricular septal thickness (IVST) are collected. The ABPM values include 24h, daytime and nighttime MAP. Hypotensive episodes (defined as significant, symptomatic BP drop, as per clinical judgement) are reported as cumulative number of episodes within the 4 weeks preceding the data entry. Patients are followed up until HD discontinuation, recorded reasons include kidney transplantation (deceased donor or living related), loss to follow-up, transfer to other centers, change modality to peritoneal dialysis, death, recovery of native kidney function, or therapy withdrawal.

**Supplemental Tables:**

Table S1. Spearman's rank-order correlations with diastolic and systolic BP-SDS

| Parameter                           | Systolic BP-SDS         |         | Diastolic BP-SDS        |         |
|-------------------------------------|-------------------------|---------|-------------------------|---------|
|                                     | Correlation coefficient | p value | Correlation coefficient | p value |
| Number of AHT                       | 0.34                    | <0.0001 | 0.3                     | <0.0001 |
| Age (years)                         | -0.23                   | <0.0001 | -0.2                    | <0.0001 |
| IDWG (% body weight)                | 0.26                    | <0.0001 | 0.24                    | <0.0001 |
| Blood hemoglobin (g/dl)             | -0.1                    | <0.0001 | -0.1                    | <0.0001 |
| Urine output (L/m <sup>2</sup> BSA) | -0.1                    | <0.0001 | -0.13                   | <0.0001 |
| HD/HDF duration (years)             | -0.07                   | <0.0002 | -0.07                   | <0.0002 |
| Serum albumin (g/L)                 | -0.06                   | 0.001   | -0.07                   | 0.003   |
| Parathormone (log, pg/ml)           | 0.07                    | 0.001   | 0.05                    | 0.003   |
| Dialysate Calcium (mmol/L)          | 0.04                    | 0.01    | 0.03                    | 0.007   |
| Dialysate Sodium (mmol/L)           | 0.002                   | 0.88    | 0.06                    | 0.001   |
| KT/V                                | 0.04                    | 0.03    | 0.01                    | 0.44    |
| Weekly dialysis time (hours)        | 0.02                    | 0.31    | 0.02                    | 0.23    |

**Supplemental Figures:**

Figure S1. Relationship between pre-dialytic systolic (left graph) and diastolic blood pressure SDS (right graph) and relative interdialytic weight gain in 2758 six-monthly observations. Systolic and diastolic BP SDS correlate with relative interdialytic weight gain ( $r=0.26/0.24$ , both  $p<0.0001$ )

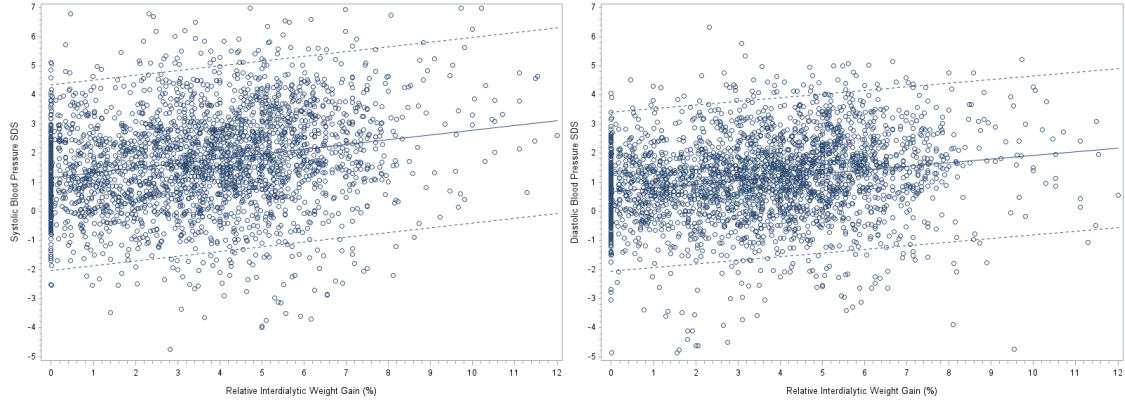

## Appendix

The following Principal Investigators are active contributors to the IPHN Registry:

**Argentina:** L. Alconcher, Hospital Interzonal General, Bahia Blanca, P.A. Coccia, Hospital Italiano de Buenos Aires, A. Suarez, Hospital de Niños Sor. Maria Ludovica La Plata, Patricia G. Valles, Hospital Pediatric Humberto Notti, Mendoza; **Canada:** Ch. Licht, Hospital for Sick Children, Toronto; **Chile:** F. Cano, Hospital Luis Calvo Mackenna, Santiago, M.A. Contreras, Roberto del Rio Hospital, Santiago. China: H. Xu, Children's Hospital of Fudan University, Shanghai. **Colombia:** J.J. Vanegas, Instituto del Rinon, Medellin; L.M. Higueta, Baxter Servicio al Cliente Colombia, Medellin. **China:** Yihui Zhai, Children's hospital of fundan University, Shanghai; E. Chan, Princess Margaret Hospital, Hong Kong; **Czech Republic:** K. Vondrak, University Hospital Motol, Prague. **Finland:** J. Lauronen, Hospital for Children and Adolescents, Helsinki. **France:** B. Ranchin, Hôpital Femme Mère Enfant, Lyon; A. Zaloszczyk, Children's Dialysis Center, Strasbourg; Ch. Samaille, Hospital Jeanne de Frandre, Lille; M. Fila, Pediatric Nephrology Unit, Montpellier, I. Vrillon, CHRU, Nancy, S. Tellier, Dialyse Pediatricue CHU, Toulouse. **Germany:** J. Thumfart, Charité Virchow-Klinikum, Berlin; L. Weber University Hospital, Cologne, Cologne; R. Büscher, Children's Hospital Essen; CP. Schmitt, F. Schaefer, D. Borzych-Duzalka Center for Pediatrics and Adolescent Medicine, Heidelberg; G. Klaus, KfH Kidney Center, Marburg; **Greece:** V. Askiti, A&P Kyriakou Children's Hospital, Athens, F. Papacristou, Aristoteles University, Thesaloniki. **Hungary:** AJ. Szabo, Semmelweis University, Budapest. **India:** N. Kamath, St. John's Medical College, Bangalore, B. Basu, NRS Medical College & Hospital, Kolkata; A. Bagga, All India Institute of Medical Sciences, New Delhi, **Iran:** N. Hooman, Iran University of Medical Sciences, Tehran. **Italy:** F. Paglialonga, S. Testa, Fondazione Ospedale Maggiore Policlinico, Milano; E. Verrina, G. Gaslini Institute, Genova; S E. Vidal, Pediatric Nephrology, Dialysis and Transplant Unit, Padova; G. Leozappa, Department of Nefrologia-Urologia, Roma, **Republic of Korea:** Hee Gyung Kang, Seoul National University Children's Hospital, Seoul; **Malaysia:** YN Lim, Kuala Lumpur Hospital, Kuala Lumpur. **Macedonia:** : E. Sahpazova Pediatric Clinic, Skopje **Nicaragua:** Y. Silva, Hospital Infantil de Nicaragua, Managua. **Oman:** M. Al Ryami, Royal Hospital, Muscat. **New Zealand:** R. Erickson, Starship Children's Hospital, Auckland. **Peru:** R. Loza Munarriz, Cayetano Heredia Hospital, Lima. **Poland:** A.M. Zurowska, D. Borzych-Duzalka, Medical University, Gdansk; D. Drozd, Jagiellonian University Medical College; M. Szczepanska, Dialysis Division for Children, Zabrze; **Philippines:** A. Marbella, National Kidney and Transplant Institute, Quezon City. **Portugal:** T. Francico, Hospital D. Estefania, Lisboa. **Saudi Arabia:** J. Kari, King Abdul Aziz University Hospital, Jeddah. **Serbia:** D. Krusic, University Children's Hospital, Belgrade. **Singapore:** H.K. Yap, Shaw-NKF-NUH Children's Kidney Center. **Spain:** G. Ariceta, University Hospital Materno-Infantil Vall d'Hebron, Barcelona. **Sweden:** L. Swartz, Barnkliniken, Lund. **Turkey:** A. Bayazit, Cukrova University, Adana A.S. Bakkaloglu, Hacettepe University, Ankara; S. Bakkaloglu, Gazi University, Ankara; I. Bilge, Department of Pediatric Nephrology, Çapa-Istanbul: Tepecik Children and Research Hospital, Izmir; S. Mir, Ege University Faculty of Medicine, Izmir-Bornova.

**United Arab Emirates:** E. Simkova, Al Jalila Hospital, Dubai. **United Kingdom:** R. Shroff, Great Ormond Street Hospital, London; C. Ried, Evelina Hospital, London. A. Kaur, Royal Manchester Hospital, Manchester; **Uruguay:** J. Grünberg, SE.N.NI.AD, Montevideo. **United States:** H. Patel, Children's Hospital, Columbus; B.A. Warady, Children's Mercy Hospital, Kansas City; M. Lee, The University of California, San Francisco; M. Rheault, University of Minnesota, Amplatz Children's Hospital, Minneapolis; M. Pradhan, The Children's Hospital of Philadelphia, Philadelphia; J. Flynn, Seattle Children's Hospital, Seattle; C. Wong, Lucile Packard Children's Hospital, Palo Alto.

STROBE Statement—checklist of items that should be included in reports of observational studies

|                           | <b>Item No</b> | <b>Recommendation</b>                                                                                                                                                                                                                                                                                                                                                                                                                                                          | <b>Page No</b> |
|---------------------------|----------------|--------------------------------------------------------------------------------------------------------------------------------------------------------------------------------------------------------------------------------------------------------------------------------------------------------------------------------------------------------------------------------------------------------------------------------------------------------------------------------|----------------|
| <b>Title and abstract</b> | 1              | (a) Indicate the study's design with a commonly used term in the title or the abstract                                                                                                                                                                                                                                                                                                                                                                                         | 2              |
|                           |                | (b) Provide in the abstract an informative and balanced summary of what was done and what was found                                                                                                                                                                                                                                                                                                                                                                            | 4              |
| <b>Introduction</b>       |                |                                                                                                                                                                                                                                                                                                                                                                                                                                                                                |                |
| Background/rationale      | 2              | Explain the scientific background and rationale for the investigation being reported                                                                                                                                                                                                                                                                                                                                                                                           | 6              |
| Objectives                | 3              | State specific objectives, including any prespecified hypotheses                                                                                                                                                                                                                                                                                                                                                                                                               | 6              |
| <b>Methods</b>            |                |                                                                                                                                                                                                                                                                                                                                                                                                                                                                                |                |
| Study design              | 4              | Present key elements of study design early in the paper                                                                                                                                                                                                                                                                                                                                                                                                                        | 7              |
| Setting                   | 5              | Describe the setting, locations, and relevant dates, including periods of recruitment, exposure, follow-up, and data collection                                                                                                                                                                                                                                                                                                                                                | 7              |
| Participants              | 6              | (a) <i>Cohort study</i> —Give the eligibility criteria, and the sources and methods of selection of participants. Describe methods of follow-up<br><br><i>Case-control study</i> —Give the eligibility criteria, and the sources and methods of case ascertainment and control selection. Give the rationale for the choice of cases and controls<br><br><i>Cross-sectional study</i> —Give the eligibility criteria, and the sources and methods of selection of participants | 7              |
|                           |                | (b) <i>Cohort study</i> —For matched studies, give matching criteria and number of exposed and unexposed<br><br><i>Case-control study</i> —For matched studies, give matching criteria and the number of controls per case                                                                                                                                                                                                                                                     |                |

|                              |    |                                                                                                                                                                                                                                                                                                                   |     |
|------------------------------|----|-------------------------------------------------------------------------------------------------------------------------------------------------------------------------------------------------------------------------------------------------------------------------------------------------------------------|-----|
| Variables                    | 7  | Clearly define all outcomes, exposures, predictors, potential confounders, and effect modifiers. Give diagnostic criteria, if applicable                                                                                                                                                                          | 7-8 |
| Data sources/<br>measurement | 8* | For each variable of interest, give sources of data and details of methods of assessment (measurement). Describe comparability of assessment methods if there is more than one group                                                                                                                              | 7-8 |
| Bias                         | 9  | Describe any efforts to address potential sources of bias                                                                                                                                                                                                                                                         | 7   |
| Study size                   | 10 | Explain how the study size was arrived at                                                                                                                                                                                                                                                                         | 6   |
| Quantitative variables       | 11 | Explain how quantitative variables were handled in the analyses. If applicable, describe which groupings were chosen and why                                                                                                                                                                                      | 7   |
| Statistical methods          | 12 | (a) Describe all statistical methods, including those used to control for confounding                                                                                                                                                                                                                             | 8-9 |
|                              |    | (b) Describe any methods used to examine subgroups and interactions                                                                                                                                                                                                                                               | 8-9 |
|                              |    | (c) Explain how missing data were addressed                                                                                                                                                                                                                                                                       |     |
|                              |    | (d) <i>Cohort study</i> —If applicable, explain how loss to follow-up was addressed<br><br><i>Case-control study</i> —If applicable, explain how matching of cases and controls was addressed<br><br><i>Cross-sectional study</i> —If applicable, describe analytical methods taking account of sampling strategy |     |
|                              |    | (e) Describe any sensitivity analyses                                                                                                                                                                                                                                                                             |     |

Continued on next page

**Results**

|                   |     |                                                                                                                                                                                                              |       |
|-------------------|-----|--------------------------------------------------------------------------------------------------------------------------------------------------------------------------------------------------------------|-------|
| Participants      | 13* | (a) Report numbers of individuals at each stage of study—eg numbers potentially eligible, examined for eligibility, confirmed eligible, included in the study, completing follow-up, and analysed            | 9-12  |
|                   |     | (b) Give reasons for non-participation at each stage                                                                                                                                                         | 9-12  |
|                   |     | (c) Consider use of a flow diagram                                                                                                                                                                           |       |
| Descriptive data  | 14* | (a) Give characteristics of study participants (eg demographic, clinical, social) and information on exposures and potential confounders                                                                     | 9     |
|                   |     | (b) Indicate number of participants with missing data for each variable of interest                                                                                                                          | 9     |
|                   |     | (c) <i>Cohort study</i> —Summarise follow-up time (eg, average and total amount)                                                                                                                             | 10-13 |
| Outcome data      | 15* | <i>Cohort study</i> —Report numbers of outcome events or summary measures over time                                                                                                                          | 10-13 |
|                   |     | <i>Case-control study</i> —Report numbers in each exposure category, or summary measures of exposure                                                                                                         |       |
|                   |     | <i>Cross-sectional study</i> —Report numbers of outcome events or summary measures                                                                                                                           |       |
| Main results      | 16  | (a) Give unadjusted estimates and, if applicable, confounder-adjusted estimates and their precision (eg, 95% confidence interval). Make clear which confounders were adjusted for and why they were included | 10-13 |
|                   |     | (b) Report category boundaries when continuous variables were categorized                                                                                                                                    |       |
|                   |     | (c) If relevant, consider translating estimates of relative risk into absolute risk for a meaningful time period                                                                                             |       |
| Other analyses    | 17  | Report other analyses done—eg analyses of subgroups and interactions, and sensitivity analyses                                                                                                               | 9     |
| <b>Discussion</b> |     |                                                                                                                                                                                                              |       |
| Key results       | 18  | Summarise key results with reference to study objectives                                                                                                                                                     | 14-15 |



|                          |    |                                                                                                                                                                            |       |
|--------------------------|----|----------------------------------------------------------------------------------------------------------------------------------------------------------------------------|-------|
| Limitations              | 19 | Discuss limitations of the study, taking into account sources of potential bias or imprecision. Discuss both direction and magnitude of any potential bias                 | 16    |
| Interpretation           | 20 | Give a cautious overall interpretation of results considering objectives, limitations, multiplicity of analyses, results from similar studies, and other relevant evidence | 14-16 |
| Generalisability         | 21 | Discuss the generalisability (external validity) of the study results                                                                                                      | 16    |
| <b>Other information</b> |    |                                                                                                                                                                            |       |
| Funding                  | 22 | Give the source of funding and the role of the funders for the present study and, if applicable, for the original study on which the present article is based              |       |

\*Give information separately for cases and controls in case-control studies and, if applicable, for exposed and unexposed groups in cohort and cross-sectional studies.

**Note:** An Explanation and Elaboration article discusses each checklist item and gives methodological background and published examples of transparent reporting. The STROBE checklist is best used in conjunction with this article (freely available on the Web sites of PLoS Medicine at <http://www.plosmedicine.org/>, Annals of Internal Medicine at <http://www.annals.org/>, and Epidemiology at <http://www.epidem.com/>). Information on the STROBE Initiative is available at [www.strobe-statement.org](http://www.strobe-statement.org).
